# Supplementary material for: Influence of diurnal variations on cognitive coordination and misunderstanding in elite male handball players
Source: PeerJ. 2026 Jan 15;14:e20370. doi: 10.7717/peerj.20370 (PMC12812274; doi:10.7717/peerj.20370)
Supplement: Supplemental Information 1 — Performance metrics, cognitive decision-making assessments, and observational data recorded at different times of the day (10:00, 14:00, and 18:00). The dataset is structured to capture variations in team dynamics, reaction times, decision-making accuracy, and communication efficiency. Each entry represents an individual player’s recorded data during controlled match simulations, with anonymized identifiers ensuring confidentiality. [file peerj-14-20370-s001.xlsx]

## Sheet: Sharing modes
Sharing modes of the forms of Articulation of Individual Activities
Forms		Match 1 (10h00)		Match 2 (14h00)		Match 3 (18h00)
		N	(%)	N	(%)	N	(%)
Similar		10	0.227273	10	0.37037	14	0.451613
Complementary		9	0.204545	9	0.333333	12	0.387097
Contradictory		10	0.227273	3	0.111111	2	0.0645161
Misunderstanding		15	0.340909	5	0.185185	3	0.0967742
Sharing modes of the contradictory and misunderstanding forms (Figure 3)
Forms		Match 1 (10h00)		Match 2 (14h00)		Match 3 (18h00)
		N	(%)	N	(%)	N	(%)
Contradictory		10	0.6666	3	0.2	2	0.1333
Misunderstanding		15	0.6521	5	0.2173	3	0.1304

## Sheet: RPD Model
	Elements of the RPD Model
Forms	RPD elements	Match 1 (10h00)		Match 2 (14h00)		Match 3 (18h00)
		N	%	N	%	N	%
Similar	Actions (A)	96	0.318937	90	0.420561	118	0.49789
	Relevant Clues ( C)	56	0.180645	43	0.238889	46	0.275449
	Plausible Goals (G)	18	0.171429	15	0.288462	21	0.368421
	Expectations (E )	11	0.119565	5	0.166667	11	0.268293
Complementary	Actions (A)	87	0.289037	88	0.411215	98	0.413502
	Relevant Clues ( C)	72	0.232258	79	0.438889	88	0.526946
	Plausible Goals (G)	27	0.257143	21	0.403846	27	0.473684
	Expectations (E )	23	0.25	16	0.533333	24	0.585366
Contradictory	Actions (A)	44	0.146179	19	0.088785	7	0.0295359
	Relevant Clues ( C)	71	0.229032	26	0.144444	6	0.0359281
	Plausible Goals (G)	26	0.247619	9	0.173077	3	0.0526316
	Expectations (E )	19	0.206522	2	0.0666667	2	0.0487805
Misunderstanding	Actions (A)	74	0.245847	17	0.0794393	14	0.0590717
	Relevant Clues ( C)	111	0.358065	32	0.177778	27	0.161677
	Plausible Goals (G)	34	0.32381	7	0.134615	6	0.105263
	Expectations (E )	39	0.423913	7	0.233333	4	0.097561
Elements of the RPD Model (Figure 2)
Forms	RPD elements	Match 1 (10h00)		Match 2 (14h00)		Match 3 (18h00)
		N	%	N	%	N	%
Contradictory	Actions (A)	44	0.6285	19	0.2714	7	0.1
	Relevant Clues ( C)	71	0.6893	26	0.2524	6	0.0582
	Plausible Goals (G)	26	0.6842	9	0.2368	3	0.0789
	Expectations (E )	19	0.826	2	0.0869	2	0.0869
Misunderstanding	Actions (A)	74	0.7047	17	0.1619	14	0.1333
	Relevant Clues ( C)	111	0.6529	32	0.1882	27	0.1588
	Plausible Goals (G)	34	0.7234	7	0.1489	6	0.1276
	Expectations (E )	39	0.78	7	0.14	4	0.08
